# Supplementary material
Source: publisher figshare collection journal article supplement (https://frontiersin.figshare.com/ndownloader/files/12381584)
Supplement: Supplementary file [file 12381584]

---

# Appendix to manuscript *Noise is not error: detecting parametric heterogeneity between epidemiologic time series*

Ethan Obie Romero-Severson<sup>1</sup>, Ruy M. Ribeiro<sup>1,2</sup> and Mario Castro<sup>3,4,\*</sup>

<sup>1</sup>Los Alamos National Laboratory, Theoretical Biology and Biophysics Group, Los Alamos, New Mexico, USA.

<sup>2</sup> Universidade de Lisboa, Faculdade de Medicina, Laboratório de Biomatemática, Lisbon, Portugal

<sup>3</sup> Universidad Pontificia Comillas, Grupo Interdisciplinar de Sistemas Complejos (GISC) and DNL, Madrid, Spain.

<sup>4</sup> University of Leeds, School of Mathematics, Department of Applied Mathematics, Leeds, UK.

Correspondence\*:

Mario Castro

marioc@comillas.edu

## APPENDIX

### A. POMP CODE

To specify a `pomp` process we need to specify a `rprocess` function that simulates the state of the system conditional on a given parameter vector and a `dmeasure` function that returns the likelihood of the data given the simulated state at a given time. Inference was performed with `pomp` version 1.13.

The `rprocess` for the deterministic birth-death model is coded as

```
step.fn = Csnippet(  
  ,  
  , double _p1, _p2, _p3, _p4, _t1, _t2, _t3, _t4;  
  , _t1 = exp(mu_a); _t2 = exp(sig_a); _t3 = exp(mu_b); _t4 = exp(sig_b);  
  , _p1 = pow(t1, 2) / pow(t2, 2);  
  , _p2 = pow(t2, 2) / t1;  
  , _p3 = pow(t3, 2) / pow(t4, 2);  
  , _p4 = pow(t4, 2) / t3;  
  , double _a = rgamma(p1, _p2);  
  , double _b = rgamma(p3, _p4);  
  , double _curpop = 1;  
  , double _S[100];  
  , int _i;  
  , for (i=1; i < 21; i++){  
  , , S[i] = curpop;  
  , , double _nbirth = curpop * _a;
```

```

curpop = curpop + nbirth;
double ndeath = curpop * b;
curpop = curpop - ndeath;
if (curpop < 0) curpop = 0;
}
S1=S[1]; S2=S[2]; S3=S[3]; S4=S[4]; S5=S[5];
S6=S[6]; S7=S[7]; S8=S[8]; S9=S[9]; S10=S[10];
S11=S[11]; S12=S[12]; S13=S[13]; S14=S[14]; S15=S[15];
S16=S[16]; S17=S[17]; S18=S[18]; S19=S[19]; S20=S[20]; S21=a;
")

```

```
rprocess = discrete.time.sim(step.fn)
```

The stochastic birth-death model is identical with the terms  $\text{curpop} * a$  and  $\text{curpop} * b$  replaced by  $\text{rpois}(\text{curpop} * a)$  and  $\text{rpois}(\text{curpop} * b)$  respectively. The `dmeasure` function is coded as

```

dmeasure = function(y, x, t, params, log, ...){
  a = x[21]; y = y[1:20]; x = x[1:20]
  pr = sum(dpois(y, x*a, log=T))
  if(log==F) pr = exp(pr)
  pr
}

```

The simulated data are generated with the following code

```

to.internal = function(mu, sig){
  p1 = mu^2/sig^2
  p2 = sig^2/mu
  c(p1,p2)
}

```

```

bd.sim = function(N, K, mu.A, sig.A, mu.B, sig.B){
  pa = to.internal(mu.A, sig.A)
  pb = to.internal(mu.B, sig.B)
  ret = data.frame(time=0:K)
  for(n in 1:N){
    if(sig.A<1e-50) a=mu.A else a = rgamma(1, pa[1], scale=pa[2])
    if(sig.B<1e-50) b=mu.B else b = rgamma(1, pb[1], scale=pb[2])
    sl = numeric(K+1)#state line
    dl = numeric(K+1)#data line
    sl[1] = 1; dl[1] = 1
    for(k in 2:(K+1)){
      n.birth = rpois(1, sl[k-1]*a)
      sl[k] = sl[k-1] + n.birth
      n.death = rpois(1, sl[k]*b)
      if(n.death > sl[k]) n.death = sl[k]
    }
  }
}

```

```

        sl[k] = sl[k] - n.death
        dl[k] = n.birth
    }
    ret[paste("d",n,sep="")] = dl
}
ret
}

A1 = list()
A1[[1]] = exp.sim(20, 20, 0.15, 0)
  early onA1[[2]] = exp.sim(20, 20, 0.15, 0.02)
A1[[3]] = bd.sim(20, 20, 0.25, 0, 0.1, 0)
A1[[4]] = bd.sim(20, 20, 0.25, 0.02, 0.1, 0.01)
saveRDS(A1, "simdat1.rda")

A2 = list()
for(i in seq(10,50,10)){
  A2[[length(A2)+1]] = bd.sim(20,i,0.15,0.02,0,0)
}
saveRDS(A2, "simdat2.rda")

A3 = list()
for(i in seq(10,50,10)){
  A3[[length(A3)+1]] = bd.sim(i,20,0.15,0.02,0,0)
}
saveRDS(A3, "simdat3.rda")

A4 = list()
for(i in seq(0.01,0.05,0.01)){
  A4[[length(A4)+1]] = bd.sim(20,20,0.15,i,0,0)
}
saveRDS(A4, "simdat4.rda")

```

## B. DERIVATION OF THE ODE SOLUTION OF THE PURE BIRTH PROCESS

For the sake of clarity, we include here a derivation of the entries in Table 2 in the main text. Using the ODE

$$\frac{dI}{dt} = \alpha I$$

as a starting point, we can derive different observables. Thus, integrating the latter equation we can find the (total) number of infected

$$\frac{dI}{I} = \alpha dt \Rightarrow \log I(t) - \log I_0 = \alpha t \Rightarrow I(t) = e^{\alpha t}.$$

Hence, the number of new cases per unit time:

$$N(t) \equiv \frac{dI}{dt} = \alpha e^{\alpha t}$$

And the number of new cases in an interval of time  $\Delta t$ ,

$$N_t \equiv \int_t^{t+\Delta t} N(t) dt = I(t + \Delta t) - I(t) = e^{\alpha t} (e^{\alpha \Delta t} - 1)$$

Finally, the total number of cases, in the absence of death, is the same as the total number that get infected,  $I(t)$ .

### C. DERIVATION OF THE EQUATION FOR $R^2$

Equation (1) in the main text allows to calculate the probability of having a total number of infected cases at time  $t$ ,  $I(t)$ , given the values of  $\mu_A$  and  $\sigma_A$ .

$$P(I|\mu_A, \sigma_A, t) = \frac{(1 - e^{-\alpha t})^{I-1} e^{-\frac{(\alpha - \mu_A)^2}{2\sigma_A^2} - \alpha t}}{\sqrt{2\pi\sigma_A^2}}, \quad I = 1, 2, \dots$$

The moments of this probability distribution are given by

$$m_k = \int_{-\infty}^{\infty} d\alpha \sum_{I=1}^{\infty} I^k P(I|\mu_A, \sigma_A, t).$$

From this formula, we can calculate the moments explicitly, and, in particular, the mean and variance will be:

$$\langle I \rangle \equiv m_1 = e^{\mu_A t + \frac{\sigma_A^2 t^2}{2}} \quad (1)$$

and

$$\sigma_I^2 \equiv m_2 - m_1^2 = -e^{\frac{\sigma_A^2 t^2}{2} + \mu_A t} + 2e^{2t(\mu_A + \sigma_A^2 t)} - e^{t(2\mu_A + \sigma_A^2 t)} \quad (2)$$

It is worth noting that both the mean and the variance of  $I$  depend on  $\mu_A$  and  $\sigma_A$ .

When  $\mu_A \rightarrow \alpha$  and  $\sigma_A \rightarrow 0$ , and there is no parametric variability (*i.e.* all the variability is due to "noise"), the expressions in Eqs. 2 and 3 of the main text are the same as the final two rows in Table 2 of the main text. In particular,

$$\sigma_{\text{noise}}^2 = e^{\alpha t} (e^{\alpha t} - 1) \quad (3)$$

When  $\sigma_A$  is small, but not zero, as is the case in some of our simulations ( $\sigma_A = 0.02$ ), we can use Taylor expansion of the terms in  $e^{\frac{\sigma_A^2 t^2}{2}}$  to approximate expression (2), for times  $t \ll 1/\sigma_A \simeq 50$ , by

$$\sigma_I^2 = e^{\alpha t} (e^{\alpha t} - 1) + \frac{1}{2} \sigma_A^2 t^2 e^{\alpha t} (6e^{\alpha t} - 1) = \sigma_{\text{noise}}^2 + \sigma_{\text{param}}^2$$

$$\sigma_{\text{param}}^2 \equiv \sigma_A^2 \frac{1}{2} t^2 e^{\alpha t} (6e^{\alpha t} - 1).$$

We can simplify the latter expression further, for times  $t \gg 1/\alpha$  (i.e., when  $e^{\alpha t} \gg 1$  and  $e^{\alpha t} - 1 \approx e^{\alpha t}$ ), to obtain

$$\sigma_I^2 \simeq e^{2\alpha t} + 3\sigma_A^2 t^2 e^{2\alpha t} = \sigma_{\text{noise}}^2 (1 + 3\sigma_A^2 t^2)$$

Finally, we can define the analogous of the coefficient of determination. In the original least squares regression,

$$R^2 = \frac{\sigma_{\hat{y}}^2}{\sigma_{\hat{y}}^2 + \sigma_r^2}$$

where  $\hat{y}$  is the vector of predicted values (namely,  $\hat{y} = ax + b$ , where  $a$  and  $b$  are the fitted coefficients) and  $r = y - \hat{y}$  the vector of residuals of the fit. In that regard, we define:

$$R^2 = \frac{\sigma_{\text{param}}^2}{\sigma_{\text{param}}^2 + \sigma_{\text{noise}}^2},$$

which gives a relative quantification of the parametric variance compared to the total variance of the stochastic process. For the pure birth case, we arrive at the following equation:

$$R^2 = \frac{\frac{1}{2}\sigma_A^2 t^2 e^{\alpha t} (6e^{\alpha t} - 1)}{e^{\alpha t} (e^{\alpha t} - 1) + \frac{1}{2}\sigma_A^2 t^2 e^{\alpha t} (6e^{\alpha t} - 1)} \simeq \frac{3\sigma_A^2 t^2}{1 + 3\sigma_A^2 t^2}$$

## **D. TABLES OF FITS TO THE SIMULATED DATA**

**Table I.** Summary of parameters used in Experiment 1 (columns  $\mu_{A,B}$  and  $\sigma_{A,B}$ ) and corresponding estimates (indicated with a hat, e.g.,  $\hat{\mu}_A$ ). Confidence intervals are obtained using the likelihood curve method described in Sec. 2.2 of the main text.

| Model | $\mu_A$ | $\hat{\mu}_A$ | CI $\hat{\mu}_A$ | $\sigma_A$ | $\hat{\sigma}_A$ | CI $\hat{\sigma}_A$ | $\mu_B$ | $\hat{\mu}_B$ | CI $\hat{\mu}_B$ | $\sigma_B$ | $\hat{\sigma}_B$ | CI $\hat{\sigma}_B$ |
|-------|---------|---------------|------------------|------------|------------------|---------------------|---------|---------------|------------------|------------|------------------|---------------------|
| Det.  | 0.15    | 0.15          | (0.15,0.16)      | 0          | -                | -                   | 0       | -             | -                | 0          | -                | -                   |
| Det.  | 0.15    | 0.13          | (0.1,0.17)       | 0          | 0.06             | (0.05,0.11)         | 0       | -             | -                | 0          | -                | -                   |
| Det.  | 0.15    | 0.13          | (0.13,0.14)      | 0.02       | -                | -                   | 0       | -             | -                | 0          | -                | -                   |
| Det.  | 0.15    | 0.12          | (0.1,0.15)       | 0.02       | 0.04             | (0.03,0.06)         | 0       | -             | -                | 0          | -                | -                   |
| Det.  | 0.25    | 0.18          | (0.17,0.18)      | 0          | -                | -                   | 0.1     | -             | -                | 0          | -                | -                   |
| Det.  | 0.25    | 0.17          | (0.12,0.21)      | 0          | 0.18             | (0.13,0.21)         | 0.1     | -             | -                | 0          | -                | -                   |
| Det.  | 0.25    | 0.18          | (0.17,0.18)      | 0.02       | -                | -                   | 0.1     | -             | -                | 0.01       | -                | -                   |
| Det.  | 0.25    | 0.16          | (0.12,0.21)      | 0.02       | 0.18             | (0.13,0.21)         | 0.1     | -             | -                | 0.01       | -                | -                   |
| Det.  | 0.15    | 0.18          | (0.17,0.2)       | 0          | -                | -                   | 0       | 0.01          | (0,0.07)         | 0          | -                | -                   |
| Det.  | 0.15    | 0.18          | (0.13,0.22)      | 0          | 0                | (0,0.04)            | 0       | -             | (0,Inf)          | 0          | 0.5              | (0.06,Inf)          |
| Det.  | 0.15    | 0.14          | (0.13,0.15)      | 0.02       | -                | -                   | 0       | 0             | (0,0.03)         | 0          | -                | -                   |
| Det.  | 0.15    | 0.14          | (0.11,0.16)      | 0.02       | 0.06             | (0.03,0.09)         | 0       | -             | (0,Inf)          | 0          | -                | (0,Inf)             |
| Det.  | 0.25    | 0.3           | (0.27,0.33)      | 0          | -                | -                   | 0.1     | 0.1           | (0.04,0.16)      | 0          | -                | -                   |
| Det.  | 0.25    | 0.32          | (0.26,0.42)      | 0          | 0.01             | (0.01,0.07)         | 0.1     | 0.21          | (0.1,0.4)        | 0          | 0.28             | (0.2,0.64)          |
| Det.  | 0.25    | 0.33          | (0.3,0.36)       | 0.02       | -                | -                   | 0.1     | 0.08          | (0.01,0.14)      | 0.01       | -                | -                   |
| Det.  | 0.25    | 0.27          | (0.2,0.38)       | 0.02       | 0                | (0,0.17)            | 0.1     | 0.17          | (0.09,0.33)      | 0.01       | 0.26             | (0.14,0.39)         |
| Sto.  | 0.15    | 0.15          | (0.13,0.17)      | 0          | -                | -                   | 0       | -             | -                | 0          | -                | -                   |
| Sto.  | 0.15    | 0.15          | (0.15,0.18)      | 0          | 0.05             | (0.03,0.11)         | 0       | -             | -                | 0          | -                | -                   |
| Sto.  | 0.15    | 0.13          | (0.12,0.15)      | 0.02       | -                | -                   | 0       | -             | -                | 0          | -                | -                   |
| Sto.  | 0.15    | 0.13          | (0.1,0.16)       | 0.02       | 0.01             | (0,0.05)            | 0       | -             | -                | 0          | -                | -                   |
| Sto.  | 0.25    | 0.17          | (0.15,0.19)      | 0          | -                | -                   | 0.1     | -             | -                | 0          | -                | -                   |
| Sto.  | 0.25    | 0.17          | (0.13,0.2)       | 0          | 0.03             | (0,0.15)            | 0.1     | -             | -                | 0          | -                | -                   |
| Sto.  | 0.25    | 0.17          | (0.15,0.19)      | 0.02       | -                | -                   | 0.1     | -             | -                | 0.01       | -                | -                   |
| Sto.  | 0.25    | 0.16          | (0.12,0.2)       | 0.02       | 0.12             | (0.05,0.2)          | 0.1     | -             | -                | 0.01       | -                | -                   |
| Sto.  | 0.15    | 0.17          | (0.14,0.2)       | 0          | -                | -                   | 0       | 0.02          | (0,0.05)         | 0          | -                | -                   |
| Sto.  | 0.15    | 0.15          | (0.12,0.19)      | 0          | 0.01             | (0.01,0.06)         | 0       | 0.55          | (0.05,2)         | 0          | -                | (0.03,Inf)          |
| Sto.  | 0.15    | 0.14          | (0.12,0.15)      | 0.02       | -                | -                   | 0       | 0             | (0,0.02)         | 0          | -                | -                   |
| Sto.  | 0.15    | 0.14          | (0.11,0.16)      | 0.02       | 0                | (0,0.03)            | 0       | -             | (0,Inf)          | 0          | -                | (0,Inf)             |
| Sto.  | 0.25    | 0.27          | (0.22,0.31)      | 0          | -                | -                   | 0.1     | 0.1           | (0.07,0.12)      | 0          | -                | -                   |
| Sto.  | 0.25    | 0.26          | (0.21,0.29)      | 0          | 0                | (0,0.03)            | 0.1     | 0.1           | (0.07,0.13)      | 0          | 0                | (0,0.19)            |
| Sto.  | 0.25    | 0.25          | (0.24,0.26)      | 0.02       | -                | -                   | 0.1     | 0.1           | (0.06,0.14)      | 0.01       | -                | -                   |
| Sto.  | 0.25    | 0.22          | (0.17,0.27)      | 0.02       | 0                | (0,0.05)            | 0.1     | 0.1           | (0.05,0.4)       | 0.01       | 0                | (0,0.4)             |

**Table II.** Summary of parameters used in Experiment 2 (columns  $\mu_A$  and  $\sigma_A$ ) and estimated (represented with the variables with a hat). Confidence intervals are obtained using the likelihood curve method described in Sec. 2.2 of the main text.

| Model | $O$ | $\mu_A$ | $\hat{\mu}_A$ | CI $\hat{\mu}_A$ | $\sigma_A$ | $\hat{\sigma}_A$ | CI $\hat{\sigma}_A$ |
|-------|-----|---------|---------------|------------------|------------|------------------|---------------------|
| Det.  | 10  | 0.150   | 0.143         | (0.11,0.2)       | 0.020      | 0.090            | (0.05,0.15)         |
| Det.  | 20  | 0.150   | 0.159         | (0.13,0.19)      | 0.020      | 0.038            | (0.03,0.05)         |
| Det.  | 30  | 0.150   | 0.151         | (0.13,0.18)      | 0.020      | 0.037            | (0.03,0.04)         |
| Det.  | 40  | 0.150   | 0.155         | (0.13,0.19)      | 0.020      | 0.047            | (0.04,0.05)         |
| Det.  | 50  | 0.150   | 0.161         | (0.14,0.19)      | 0.020      | 0.036            | (0.03,0.04)         |
| Sto.  | 10  | 0.150   | 0.150         | (0.11,0.21)      | 0.020      | 0.060            | (0,0.15)            |
| Sto.  | 20  | 0.150   | 0.168         | (0.14,0.2)       | 0.020      | 0.002            | (0,0.04)            |
| Sto.  | 30  | 0.150   | 0.158         | (0.13,0.19)      | 0.020      | 0.00001          | (0,0.02)            |
| Sto.  | 40  | 0.150   | 0.163         | (0.14,0.2)       | 0.020      | 0.026            | (0.01,0.05)         |
| Sto.  | 50  | 0.150   | 0.153         | (0.14,0.16)      | 0.020      | 0.017            | (0.01,0.02)         |

**Table III.** Summary of parameters used in Experiment 3 (columns  $\mu_A$  and  $\sigma_A$ ) and estimated (represented with the variables with a hat). Confidence intervals are obtained using the likelihood curve method described in Sec. 2 of the main text.

| Model | $N$ | $\mu_A$ | $\hat{\mu}_A$ | CI $\hat{\mu}_A$ | $\sigma_A$ | $\hat{\sigma}_A$ | CI $\hat{\sigma}_A$ |
|-------|-----|---------|---------------|------------------|------------|------------------|---------------------|
| Det.  | 10  | 0.150   | 0.127         | (0.09,0.18)      | 0.020      | 0.040            | (0.03,0.09)         |
| Det.  | 20  | 0.150   | 0.144         | (0.12,0.19)      | 0.020      | 0.047            | (0.04,0.08)         |
| Det.  | 30  | 0.150   | 0.139         | (0.11,0.16)      | 0.020      | 0.047            | (0.04,0.07)         |
| Det.  | 40  | 0.150   | 0.142         | (0.12,0.17)      | 0.020      | 0.047            | (0.04,0.06)         |
| Det.  | 50  | 0.150   | 0.139         | (0.12,0.16)      | 0.020      | 0.047            | (0.04,0.07)         |
| Sto.  | 10  | 0.150   | 0.137         | (0.1,0.2)        | 0.020      | 0.058            | (0,0.15)            |
| Sto.  | 20  | 0.150   | 0.175         | (0.13,0.21)      | 0.020      | 0.060            | (0,0.12)            |
| Sto.  | 30  | 0.150   | 0.156         | (0.13,0.19)      | 0.020      | 0.051            | (0.01,0.11)         |
| Sto.  | 40  | 0.150   | 0.163         | (0.14,0.2)       | 0.020      | 0.054            | (0.01,0.1)          |
| Sto.  | 50  | 0.150   | 0.165         | (0.14,0.2)       | 0.020      | 0.057            | (0.02,0.09)         |

**Table IV.** Summary of parameters used in Experiment 4 (columns  $\mu_A$  and  $\sigma_A$ ) and estimated (represented with the variables with a hat). Confidence intervals are obtained using the likelihood curve method described in Sec. 2 of the main text.

| Model | $\mu_A$ | $\hat{\mu}_A$ | CI $\hat{\mu}_A$ | $\sigma_A$ | $\hat{\sigma}_A$ | CI $\hat{\sigma}_A$ |
|-------|---------|---------------|------------------|------------|------------------|---------------------|
| Det.  | 0.150   | 0.143         | (0.11,0.19)      | 0.010      | 0.048            | (0.04,0.09)         |
| Det.  | 0.150   | 0.148         | (0.12,0.19)      | 0.020      | 0.047            | (0.04,0.08)         |
| Det.  | 0.150   | 0.127         | (0.1,0.16)       | 0.030      | 0.051            | (0.04,0.08)         |
| Det.  | 0.150   | 0.130         | (0.1,0.18)       | 0.040      | 0.051            | (0.04,0.08)         |
| Det.  | 0.150   | 0.175         | (0.13,0.21)      | 0.050      | 0.066            | (0.06,0.1)          |
| Sto.  | 0.150   | 0.173         | (0.13,0.21)      | 0.010      | 0.056            | (0,0.12)            |
| Sto.  | 0.150   | 0.178         | (0.14,0.21)      | 0.020      | 0.045            | (0,0.11)            |
| Sto.  | 0.150   | 0.139         | (0.11,0.19)      | 0.030      | 0.048            | (0,0.11)            |
| Sto.  | 0.150   | 0.147         | (0.11,0.2)       | 0.040      | 0.100            | (0.05,0.16)         |
| Sto.  | 0.150   | 0.192         | (0.15,0.24)      | 0.050      | 0.110            | (0.06,0.16)         |
